# Supplementary material for: Functional and Environmental Performances of Novel Electrolytic Membranes for PEM Fuel Cells: A Lab-Scale Case Study
Source: MDPI journal article supplement (doi:10.3390/cleantechnol5010005), 2023-01-09
Supplement: s1 [file s1]

## Supplementary Materials

### Functional and environmental performances of novel electrolytic membranes for PEM fuel cells: a lab-scale case study

#### Section S1. Goal and Scope

**Table S1.** Experimental data of Nafion® 212, SGO, GONS, and BSGO. Proton conductivity values refer to the EIS tests performed on rectangular samples exposed to T=80 °C and RH=100%.

| Membrane    | Experimental mass<br>(g/DU) | Experimental thickness<br>(μm) | Experimental conductivity<br>(S cm <sup>-1</sup> ) |
|-------------|-----------------------------|--------------------------------|----------------------------------------------------|
| Nafion® 212 | 1.628                       | 50.8                           | 0.56                                               |
| SGO         | 1.364                       | 12.0                           | 1.15                                               |
| GONS        | 0.803                       | 17.1                           | 1.71                                               |
| BSGO        | 1.397                       | 11.6                           | 0.19                                               |

#### Section S2. Life Cycle Inventory (LCI) of the involved materials

**Table S2.1.** LCI of the production of Graphene Oxide (GO) [48].

| INPUTS                                                   |                                                                   |        |      |
|----------------------------------------------------------|-------------------------------------------------------------------|--------|------|
| Flow                                                     | Provider                                                          | Amount | Unit |
| Graphite                                                 | Market for graphite, battery grade – GLO                          | 0.71   | kg   |
| Sulfuric acid (H <sub>2</sub> SO <sub>4,aq</sub> )       | Market for sulfuric acid – RER                                    | 30.20  | kg   |
| Deionized water                                          | Market for water, ultrapure – RER                                 | 223    | kg   |
| Hydrogen peroxide (H <sub>2</sub> O <sub>2</sub> , 100%) | Market for hydrogen peroxide, w/o water, 50% solution state – RER | 1.24   | kg   |
| Sodium nitrate (NaNO <sub>3</sub> )                      | Market for sodium nitrate – GLO                                   | 0.36   | kg   |
| Potassium permanganate (KMnO <sub>4</sub> )              | Market for potassium permanganate – GLO                           | 2.14   | kg   |
| Calcium hydroxide (Ca(OH) <sub>2</sub> )                 | Market for lime, hydrated, loose weight – RoW                     | 22.80  | kg   |
| Electricity                                              | Market group for electricity, medium voltage – EU w/o CH          | 10     | MJ   |
| OUTPUTS                                                  |                                                                   |        |      |
| Flow                                                     | Provider                                                          | Amount | Unit |
| Graphene Oxide (GO)                                      | GO, for laboratory                                                | 1.00   | kg   |

**Table S2.2.** LCI of the production of Nafion® [49].

| INPUTS                                               |                                                                     |                          |       |
|------------------------------------------------------|---------------------------------------------------------------------|--------------------------|-------|
| Flow                                                 | Provider                                                            | Amount                   | Unit  |
| Tetrafluoroethylene (C <sub>2</sub> F <sub>4</sub> ) | Market for tetrafluoroethylene – GLO                                | 1.30                     | kg    |
| Sulfur trioxide (SO <sub>3</sub> )                   | Market for sulfur trioxide – RER                                    | 0.50                     | kg    |
| Hexafluoropropene (C <sub>3</sub> F <sub>6</sub> )   | Market for hexafluoropropene – GLO                                  | 3.20                     | kg    |
| Sodium hypochlorite (NaClO)                          | Market for sodium hypochlorite, w/o water, 15% solution state – GLO | 3.00                     | kg    |
| Sodium hydroxide (NaOH)                              | Market for sodium hydroxide, w/o water, 50% solution state – GLO    | 0.60                     | kg    |
| Sodium carbonate (Na <sub>2</sub> CO <sub>3</sub> )  | Market for soda ash, dense – GLO                                    | 0.11                     | kg    |
| Organics                                             | Market for chemical factory, organics – GLO                         | 4.00 × 10 <sup>-10</sup> | Items |

| Process heat                           | Market group for heat, district or industrial, and natural gas – RER | 39.31                 | MJ   |
|----------------------------------------|----------------------------------------------------------------------|-----------------------|------|
| Transport lorry                        | Market group for transport, freight, lorry, unspecified – GLO        | 0.87                  | t·km |
| Transport train                        | Market for transport, freight train – EU w/o CH                      | 5.22                  | t·km |
| OUTPUTS                                |                                                                      |                       |      |
| Flow                                   | Provider                                                             | Amount                | Unit |
| Nafion® membrane                       | Nafion membrane®, for PEMFC                                          | 1.00                  | kg   |
| Sodium chloride (NaCl)                 | Sodium chloride, to water                                            | 2.36                  | kg   |
| Sodium hydroxide (NaOH <sub>aq</sub> ) | Sodium hydroxide, to water                                           | 1.87                  | kg   |
| Sodium fluoride (NaF)                  | Sodium fluoride                                                      | $8.48 \times 10^{-2}$ | kg   |
| Carbon dioxide (CO <sub>2</sub> )      | Carbon dioxide, fossil, to air                                       | $8.88 \times 10^{-2}$ | kg   |
| Organic residue                        | Treatment of spent solvent mixture – EU w/o CH                       | 2.81                  | kg   |
| Plastic residue                        | Treatment of waste plastic, mixture – EU w/o CH                      | 0.11                  | kg   |
| Oily residue                           | Treatment of bilge oil – EU w/o CH                                   | 0.38                  | kg   |

**Table S2.3.** LCI of the production of a Sulfonated Graphene Oxide (SGO) membrane.

| INPUTS                                             |                                                          |        |      |
|----------------------------------------------------|----------------------------------------------------------|--------|------|
| Flow                                               | Provider                                                 | Amount | Unit |
| Graphene Oxide (GO)                                | GO, for laboratory                                       | 0.60   | g    |
| Sulfuric acid (H <sub>2</sub> SO <sub>4,aq</sub> ) | Market for sulfuric acid – RER                           | 15.90  | g    |
| Deionized water                                    | Market for deionized water – EU w/o CH                   | 600    | g    |
| Electricity                                        | Market group for electricity, medium voltage – EU w/o CH | 32.87  | MJ   |
| OUTPUTS                                            |                                                          |        |      |
| Flow                                               | Provider                                                 | Amount | Unit |
| Sulfonate Graphene Oxide (SGO)                     | SGO membrane, for PEMFC                                  | 1.364  | g    |
| Wastewater                                         | Treatment of wastewater – EU w/o CH                      | 600    | g    |

**Table S2.4.** LCI of the production of a Graphene Oxide-Naphthalene Sulfonate (GONS) membrane.

| INPUTS                                      |                                                          |        |      |
|---------------------------------------------|----------------------------------------------------------|--------|------|
| Flow                                        | Provider                                                 | Amount | Unit |
| Graphene Oxide (GO)                         | GO, for laboratory                                       | 0.60   | g    |
| Naphthalene sulfonic acid (NS)              | Market for naphthalene sulfonic acid – GLO               | 0.783  | g    |
| Deionized water                             | Market for deionized water – EU w/o CH                   | 300    | g    |
| Electricity                                 | Market group for electricity, medium voltage – EU w/o CH | 124.96 | MJ   |
| OUTPUTS                                     |                                                          |        |      |
| Flow                                        | Provider                                                 | Amount | Unit |
| Graphene Oxide-Naphthalene Sulfonate (GONS) | GONS membrane, for PEMFC                                 | 0.803  | g    |
| Wastewater                                  | Treatment of wastewater – EU w/o CH                      | 300    | g    |

**Table S2.5.** LCI of the production of a Borate-reinforced Sulfonated Graphene Oxide (BSGO) membrane.

| INPUTS                                                                                             |                                                          |        |      |
|----------------------------------------------------------------------------------------------------|----------------------------------------------------------|--------|------|
| Flow                                                                                               | Provider                                                 | Amount | Unit |
| Graphene Oxide (GO)                                                                                | GO, for laboratory                                       | 0.60   | g    |
| Sulfuric acid (H <sub>2</sub> SO <sub>4,aq</sub> )                                                 | Market for sulfuric acid – RER                           | 15.90  | g    |
| Sodium tetraborate decahydrate (Na <sub>2</sub> B <sub>4</sub> O <sub>7</sub> ·10H <sub>2</sub> O) | Market for Borax, anhydrous, powder – GLO                | 0.081  | g    |
| Deionized water                                                                                    | Market for deionized water – EU w/o CH                   | 600    | g    |
| Electricity                                                                                        | Market group for electricity, medium voltage – EU w/o CH | 39.64  | MJ   |
| OUTPUTS                                                                                            |                                                          |        |      |
| Flow                                                                                               | Provider                                                 | Amount | Unit |
| Borate-reinforced Sulfonated Graphene Oxide (BSGO)                                                 | BSGO membrane, for PEMFC                                 | 0.803  | g    |
| Wastewater                                                                                         | Treatment of wastewater – EU w/o CH                      | 600    | g    |

**Section S3.** Supplementary results of Life Cycle Impact Assessment

EF 3.0 method [65] is the impact assessment method adopted in Environmental Footprint transition phase of the European Commission and it includes normalization [66] and weighting factors [67].

**Table S3.1.** Impact assessment results of Nafion® 212, SGO, GONS, and BSGO per DU at the normalization step.

| Impact category                   | Unit | Nafion® 212           | SGO                   | GONS                  | BSGO                  |
|-----------------------------------|------|-----------------------|-----------------------|-----------------------|-----------------------|
| Climate change                    | –    | $4.49 \times 10^{-5}$ | $4.49 \times 10^{-4}$ | $1.70 \times 10^{-3}$ | $5.39 \times 10^{-4}$ |
| Ozone depletion                   | –    | $1.39 \times 10^{-4}$ | $3.34 \times 10^{-6}$ | $1.26 \times 10^{-5}$ | $4.01 \times 10^{-6}$ |
| Ionizing radiation                | –    | $2.67 \times 10^{-6}$ | $4.92 \times 10^{-4}$ | $1.87 \times 10^{-3}$ | $5.93 \times 10^{-4}$ |
| Photochemical ozone formation     | –    | $8.04 \times 10^{-6}$ | $1.98 \times 10^{-4}$ | $7.45 \times 10^{-4}$ | $2.37 \times 10^{-4}$ |
| Particulate matter                | –    | $8.32 \times 10^{-6}$ | $1.00 \times 10^{-4}$ | $3.67 \times 10^{-4}$ | $1.18 \times 10^{-4}$ |
| Human toxicity, non-cancer        | –    | $2.13 \times 10^{-5}$ | $1.47 \times 10^{-4}$ | $5.51 \times 10^{-4}$ | $1.76 \times 10^{-4}$ |
| Human toxicity, cancer            | –    | $2.06 \times 10^{-5}$ | $6.10 \times 10^{-5}$ | $2.28 \times 10^{-4}$ | $7.30 \times 10^{-5}$ |
| Acidification                     | –    | $1.19 \times 10^{-5}$ | $3.55 \times 10^{-4}$ | $1.32 \times 10^{-3}$ | $4.23 \times 10^{-4}$ |
| Eutrophication, freshwater        | –    | $2.50 \times 10^{-5}$ | $2.24 \times 10^{-3}$ | $8.48 \times 10^{-3}$ | $2.69 \times 10^{-3}$ |
| Eutrophication, marine            | –    | $4.67 \times 10^{-6}$ | $1.72 \times 10^{-4}$ | $6.50 \times 10^{-4}$ | $2.07 \times 10^{-4}$ |
| Eutrophication, terrestrial       | –    | $5.25 \times 10^{-6}$ | $1.66 \times 10^{-4}$ | $6.26 \times 10^{-4}$ | $2.00 \times 10^{-4}$ |
| Ecotoxicity, freshwater           | –    | $9.73 \times 10^{-5}$ | $9.86 \times 10^{-4}$ | $3.56 \times 10^{-3}$ | $1.17 \times 10^{-3}$ |
| Land use                          | –    | $3.79 \times 10^{-7}$ | $1.37 \times 10^{-5}$ | $5.17 \times 10^{-5}$ | $1.64 \times 10^{-5}$ |
| Water use                         | –    | $5.61 \times 10^{-6}$ | $7.76 \times 10^{-5}$ | $2.82 \times 10^{-4}$ | $9.14 \times 10^{-5}$ |
| Resource use, fossils             | –    | $1.92 \times 10^{-5}$ | $1.18 \times 10^{-3}$ | $4.46 \times 10^{-3}$ | $1.41 \times 10^{-3}$ |
| Resource use, minerals and metals | –    | $4.67 \times 10^{-5}$ | $1.37 \times 10^{-4}$ | $5.05 \times 10^{-4}$ | $1.62 \times 10^{-4}$ |

**Table S3.2.** Impact assessment results of Nafion® 212, SGO, GONS, and BSGO per DU after weighting, scores are in milli-ecopoints (mPt).

| Impact category                   | Unit | Nafion® 212           | SGO                   | GONS                  | BSGO                  |
|-----------------------------------|------|-----------------------|-----------------------|-----------------------|-----------------------|
| Total                             | mPt  | $2.96 \times 10^{-2}$ | $3.72 \times 10^{-1}$ | $1.40 \times 10^0$    | $4.47 \times 10^{-1}$ |
| Climate change                    | mPt  | $9.47 \times 10^{-3}$ | $9.45 \times 10^{-2}$ | $3.57 \times 10^{-1}$ | $1.13 \times 10^{-1}$ |
| Ozone depletion                   | mPt  | $8.77 \times 10^{-3}$ | $2.11 \times 10^{-4}$ | $7.95 \times 10^{-4}$ | $2.53 \times 10^{-4}$ |
| Ionizing radiation                | mPt  | $1.34 \times 10^{-4}$ | $2.47 \times 10^{-2}$ | $9.36 \times 10^{-2}$ | $2.97 \times 10^{-2}$ |
| Photochemical ozone formation     | mPt  | $3.84 \times 10^{-4}$ | $9.44 \times 10^{-3}$ | $3.56 \times 10^{-2}$ | $1.13 \times 10^{-2}$ |
| Particulate matter                | mPt  | $7.45 \times 10^{-4}$ | $9.00 \times 10^{-3}$ | $3.29 \times 10^{-2}$ | $1.06 \times 10^{-2}$ |
| Human toxicity, non-cancer        | mPt  | $3.92 \times 10^{-4}$ | $2.70 \times 10^{-3}$ | $1.01 \times 10^{-2}$ | $3.23 \times 10^{-3}$ |
| Human toxicity, cancer            | mPt  | $4.38 \times 10^{-4}$ | $1.30 \times 10^{-3}$ | $4.85 \times 10^{-3}$ | $1.55 \times 10^{-3}$ |
| Acidification                     | mPt  | $7.36 \times 10^{-4}$ | $2.20 \times 10^{-2}$ | $8.21 \times 10^{-2}$ | $2.62 \times 10^{-2}$ |
| Eutrophication, freshwater        | mPt  | $7.01 \times 10^{-4}$ | $6.26 \times 10^{-2}$ | $2.37 \times 10^{-1}$ | $7.54 \times 10^{-2}$ |
| Eutrophication, marine            | mPt  | $1.38 \times 10^{-4}$ | $5.10 \times 10^{-3}$ | $1.92 \times 10^{-2}$ | $6.13 \times 10^{-3}$ |
| Eutrophication, terrestrial       | mPt  | $1.95 \times 10^{-4}$ | $6.14 \times 10^{-3}$ | $2.32 \times 10^{-2}$ | $7.38 \times 10^{-3}$ |
| Ecotoxicity, freshwater           | mPt  | $1.87 \times 10^{-3}$ | $1.89 \times 10^{-2}$ | $6.83 \times 10^{-2}$ | $2.25 \times 10^{-2}$ |
| Land use                          | mPt  | $3.01 \times 10^{-5}$ | $1.09 \times 10^{-3}$ | $4.10 \times 10^{-3}$ | $1.30 \times 10^{-3}$ |
| Water use                         | mPt  | $4.77 \times 10^{-4}$ | $6.60 \times 10^{-3}$ | $2.40 \times 10^{-2}$ | $7.78 \times 10^{-3}$ |
| Resource use, fossils             | mPt  | $1.59 \times 10^{-3}$ | $9.78 \times 10^{-2}$ | $3.71 \times 10^{-1}$ | $1.18 \times 10^{-1}$ |
| Resource use, minerals and metals | mPt  | $3.53 \times 10^{-3}$ | $1.03 \times 10^{-2}$ | $3.81 \times 10^{-2}$ | $1.22 \times 10^{-2}$ |

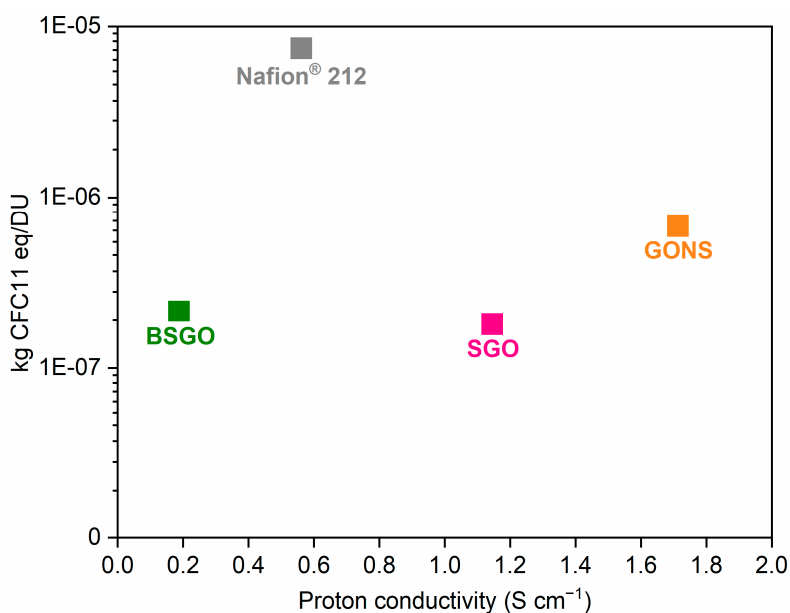

**Figure S3.1.** Ozone depletion of Nafion® 212, SGO, GONS, and BSGO with respect to their corresponding proton conductivity.
